# Supplementary material for: Glycoproteomic analysis of tissues from patients with colon cancer using lectin microarrays and nanoLC-MS/MS
Source: Royal Society of Chemistry journal article supplement (doi:10.1039/c3mb00013c), 2013-03-12
Supplement: c3mb00013c.pdf [file c3mb00013c.pdf]

**Table S1. The sugar-binding specificities of the lectins**

| Lectin                        | Abbreviation | Ratio(C/N) | Specificity                                                    | Print monosaccharide |
|-------------------------------|--------------|------------|----------------------------------------------------------------|----------------------|
| Solanum                       |              |            |                                                                |                      |
| Tuberosum<br>(Potato) Lectin  | STL          | 2.5***     | (GlcNAc) <sub>n</sub>                                          | GlcNAc               |
| Lycopersicon                  |              |            |                                                                |                      |
| Esculentum<br>(Tomato) Lectin | LTL          | 2.8***     | Poly-LacNAc and (GlcNAc) <sub>n</sub>                          | LacNAc               |
| Bandeiraea<br>simplicifolia   | BS-I         | 4***       | αGal and αGalNAc                                               | Galactose            |
| Soybean<br>Agglutinin         | SBA          | 4.6***     | Terminal GalNAc(especially<br>GalNAcα1-3Gal)                   | GalNAc               |
| Triticum vulgare              | WGA          | 5.4***     | Terminal GlcNAc and (GlcNAc) <sub>n</sub> ,<br>and Sialic acid | GlcNAc               |
| Sambucus Nigra<br>Lectin      | SNA          | 2.3***     | Sia2-6Galβ1-4Glc(NAc)                                          | GlcNAc               |

Note:

► Ratio(C/N):relative signal intensity of lectins in colon cancer vs normal tissues

► \*\*\*:  $p < 0.001$

**Table S2. Clinical features of human tissue samples used for IHC experiment**

| <b>Paired number</b> | <b>Gender</b> | <b>Age</b> | <b>Grade</b> |
|----------------------|---------------|------------|--------------|
| 1                    | Male          | 64         | II           |
| 2                    | Famale        | 72         | III          |
| 3                    | Male          | 70         | III          |
| 4                    | Male          | 49         | I            |
| 5                    | Male          | 33         | II           |
| 6                    | Female        | 63         | II           |
| 7                    | Female        | 53         | II           |
| 8                    | Male          | 48         | I            |
| 9                    | Male          | 55         | II           |
| 10                   | Female        | 50         | II           |

**Table S3. Identification and relative quantitation of STL-enriched proteins in normal vs colon cancer tissues through quantitative glycoproteomics analysis**

| IPI<br>Accession | Protein name                                          | Replicate 1 |         | Replicate 2 |         |
|------------------|-------------------------------------------------------|-------------|---------|-------------|---------|
|                  |                                                       | Ratio(C/N)  | p-value | Ratio(C/N)  | p-value |
| IPI01018712      | ACTA2 protein Fragment                                | 16.67       | 0.99    | -           |         |
| IPI00021428      | Actin alpha skeletal muscle                           | 1.14        | 0.58    | -           |         |
| IPI00008603      | Actin aortic smooth muscle                            | N           |         | N           |         |
| IPI00021439      | Actin cytoplasmic 1                                   | 1.05        | 0.42    | 1.16        | 0.46    |
| IPI00025416      | Actin gamma enteric smooth muscle                     | 0.85        | 0.39    | -           |         |
| IPI00916212      | Actin gamma enteric smooth muscle isoform 2 precursor | 0.97        | 0.28    | -           |         |
| IPI00003269      | Beta actin like protein 2                             | 5.26        | 0.99    | -           |         |
| IPI00888712      | Putative beta actin like protein 3                    | 10          | 0.99    | -           |         |
| IPI00218918      | Annexin A1                                            | -           |         | C           |         |
| IPI00418169      | Isoform 2 of Annexin A2                               | -           |         | 1.41        | 0.69    |
| IPI00334627      | Putative annexin A2 like protein                      | C           |         | -           |         |
| IPI00872780      | cDNA FLJ51794 highly similar to Annexin A4            | C           |         | -           |         |
| IPI00329801      | Annexin A5                                            | -           |         | 1.33        | 0.61    |
| IPI00221226      | Annexin A6                                            | -           |         | 1.27        | 0.58    |
| IPI00784295      | Isoform 1 of Heat shock protein HSP 90 alpha          | 1.72        | 0.99    | 1.54        | 0.98    |
| IPI00382470      | Isoform 2 of Heat shock protein HSP 90 alpha          | 0.96        | 0.29    | 1.12        | 0.34    |
| IPI00414676      | Heat shock protein HSP 90 beta                        | 1.45        | 0.99    | 1.72        | 0.99    |
| IPI00555614      | Putative heat shock protein HSP 90 beta 3             | 2.08        | 0.99    | -           |         |
| IPI00410714      | Hemoglobin subunit alpha                              | -           |         | 0.62        | 0.22    |
| IPI00654755      | Hemoglobin subunit beta                               | 0.79        | 0.39    | 1.14        | 0.72    |
| IPI01018810      | Mutant beta globin                                    | 1.19        | 0.8     | 0.64        | 0.16    |
| IPI00335168      | Isoform Non muscle of Myosin light polypeptide 6      | -           |         | 0.21        | 0.01    |
| IPI00019502      | Isoform 1 of Myosin 9                                 | 1.64        | 0.99    | 1.89        | 0.99    |
| IPI00397526      | Isoform 1 of Myosin 10                                | 1.43        | 0.66    | -           |         |
| IPI00479307      | Isoform 2 of Myosin 10                                | 1.14        | 0.59    | -           |         |
| IPI00020501      | Myosin 11                                             | 0.41        | 0.01    | 0.32        | 0.01    |
| IPI00024870      | myosin 11 isoform SM2A                                | 2.38        | 0.99    | -           |         |
| IPI00743857      | myosin 11 isoform SM1B                                | 0.39        | 0.99    | -           |         |
| IPI00744256      | myosin 11 isoform SM2B                                | 0.43        | 0.01    | -           |         |
| IPI00917753      | SET nuclear oncogene                                  | -           |         | 2.86        | 0.99    |
| IPI00301311      | Isoform 2 of Protein SET                              | -           |         | 3.7         | 0.99    |

**Continued**

| IPI         | Protein name                                                                       | Replicate 1 |         | Replicate 2 |         |
|-------------|------------------------------------------------------------------------------------|-------------|---------|-------------|---------|
|             |                                                                                    | Ratio(C/N)  | p-value | Ratio(C/N)  | p-value |
| IPI00479743 | Isoform 1 of POTE ankyrin domain family member E                                   | 0.76        | 0.1     | -           |         |
| IPI00739539 | POTE ankyrin domain family member F                                                | 0.28        | 0.01    | -           |         |
| IPI00740545 | POTE ankyrin domain family member I                                                | 8.33        | 0.99    | -           |         |
| IPI00738655 | POTE ankyrin domain family member J                                                | 50          | 0.99    | -           |         |
| IPI00977640 | sodium potassium transporting ATPase subunit alpha 1 isoform d                     | 1.39        | 0.72    | -           |         |
| IPI00003021 | Sodium potassium transporting ATPase subunit alpha 2                               | N           |         | -           |         |
| IPI00302840 | Sodium potassium transporting ATPase subunit alpha 3                               | C           |         | -           |         |
| IPI00006482 | Isoform Long of Sodium potassium transporting ATPase subunit alpha 1               | 0.84        | 0.43    | 0.71        | 0.11    |
| IPI00414005 | Isoform Short of Sodium potassium transporting ATPase subunit alpha 1              | N           |         | -           |         |
| IPI00790327 | cDNA FLJ59513 highly similar to Sodium potassium transporting ATPase alpha 3 chain | N           |         | -           |         |
| IPI00180675 | Tubulin alpha 1A chain                                                             | -           |         | 0.46        | 0.02    |
| IPI00007750 | Tubulin alpha 4A chain                                                             | -           |         | 1.75        | 0.98    |
| IPI00645452 | Tubulin beta                                                                       | -           |         | 0.99        | 0.43    |
| IPI00007752 | Tubulin beta 2C chain                                                              | -           |         | 0.89        | 0.38    |
| IPI00387144 | cDNA FLJ55956 highly similar to Tubulin alpha 6 chain                              | 1.61        | 0.98    |             |         |
| IPI00179709 | Isoform 1 of Tubulin alpha 3C D chain                                              | -           |         | 0.53        | 0.03    |
| IPI00018146 | 14-3-3 protein theta                                                               | C           |         | -           |         |
| IPI00792712 | 39 kDa protein                                                                     | -           |         | C           |         |
| IPI00303476 | ATP synthase subunit beta mitochondrial                                            | -           |         | 0.68        | 0.27    |
| IPI00941747 | Calnexin                                                                           | N           |         | -           |         |
| IPI00790433 | Caveolin 3                                                                         | -           |         | C           |         |
| IPI01018949 | cDNA FLJ51266 highly similar to Vitronectin                                        | C           |         | -           |         |
| IPI01015219 | cDNA FLJ52353 highly similar to 26S protease regulatory subunit 7                  | C           |         | -           |         |

**Continued**

| IPI<br>Accession | Protein name                                                                                            | Replicate 1 |         | Replicate 2 |         |
|------------------|---------------------------------------------------------------------------------------------------------|-------------|---------|-------------|---------|
|                  |                                                                                                         | Ratio(C/N)  | p-value | Ratio(C/N)  | p-value |
| IPI00000858      | cDNA FLJ56180 highly similar to<br>Negative elongation factor E                                         | -           |         | C           |         |
| IPI00921995      | cDNA FLJ60556 highly similar to<br>Homo sapiens suppression of<br>tumorigenicity 7 like ST7L transcript | -           |         | C           |         |
| IPI00010896      | Chloride intracellular channel protein 1                                                                | -           |         | C           |         |
| IPI00012011      | Cofilin 1                                                                                               | -           |         | C           |         |
| IPI00025874      | Dolichyl diphosphooligosaccharide<br>protein glycosyltransferase subunit 1<br>precursor                 | 0.51        | 0.04    | -           |         |
| IPI00013079      | EMILIN 1                                                                                                | -           |         | N           |         |
| IPI00221232      | Guanine nucleotide binding protein G I<br>G S G O subunit gamma 12                                      | 0.45        | 0.02    | -           |         |
| IPI00186460      | Isoform 1 of Collagen alpha 1 II chain                                                                  | -           |         | C           |         |
| IPI00477747      | Isoform 1 of Follistatin related protein 4                                                              | -           |         | C           |         |
| IPI00549248      | Isoform 1 of Nucleophosmin                                                                              | -           |         | C           |         |
| IPI00827813      | Isoform 2F of Cytoplasmic dynein 1<br>intermediate chain 2                                              | N           |         | -           |         |
| IPI00337387      | Isoform 3 of Pre mRNA processing<br>factor 40 homolog A                                                 | N           |         | -           |         |
| IPI00179330      | Ubiquitin 40S ribosomal protein S27a                                                                    | N           |         | -           |         |
| IPI00291827      | Neutral alpha glucosidase C                                                                             | -           |         | C           |         |
| IPI00219773      | Ornithine decarboxylase antizyme 1                                                                      | N           |         | -           |         |
| IPI00982925      | Truncated beta globin                                                                                   | 0.63        | 0.07    | -           |         |

\*-: not detected

\*N: proteins were detected in normal tissues only.

\*C: proteins were detected in colon cancer only.

\*Significant changes of protein abundances were defined: 1) selecting those proteins identified in at least two of three injections; 2) protein ratios above 1.5 and p-value > 0.95 for three experimental replicates.

**Table S4. Clinical features of human tissue samples of TMA**

| <b>Paired number</b> | <b>Gender</b> | <b>Age</b> | <b>Grade</b> |
|----------------------|---------------|------------|--------------|
| 1                    | Femal         | 56         | I            |
| 2                    | Male          | 56         | I            |
| 3                    | Male          | 56         | II           |
| 4                    | Male          | 64         | I            |
| 5                    | Male          | 66         | II           |
| 6                    | Male          | 30         | II           |
| 7                    | Male          | 60         | II           |
| 8                    | Male          | 57         | II           |
| 9                    | Femal         | 77         | II           |
| 10                   | Male          | 63         | III          |
| 11                   | Male          | 67         | II           |
| 12                   | Male          | 42         | II           |
| 13                   | Femal         | 52         | II           |
| 14                   | Male          | 71         | II           |
| 15                   | Femal         | 32         | III          |
| 16                   | Male          | 31         | II           |
| 17                   | Male          | 43         | II           |
| 18                   | Male          | 47         | II           |
| 19                   | Male          | 79         | II           |

---

|    |        |    |     |
|----|--------|----|-----|
| 20 | Male   | 52 | II  |
| 21 | Female | 73 | II  |
| 22 | Male   | 38 | II  |
| 23 | Male   | 70 | III |
| 24 | Male   | 74 | II  |
| 25 | Female | 20 | III |

---

**Suppl.Fig.1**

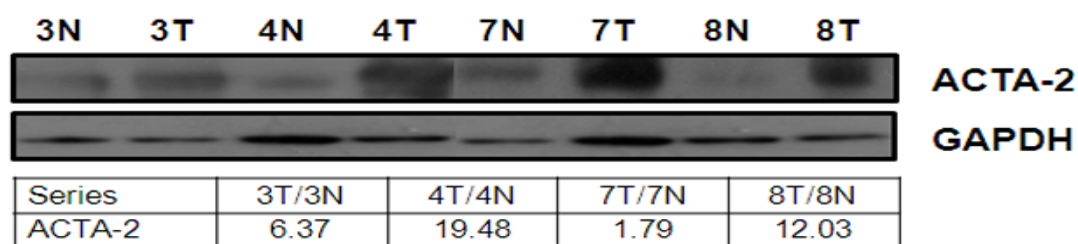

Suppl. Fig.1 Validation of ACTA-2 in colon cancer by Western Blot. Cell lysates containing equal amounts of proteins from colon cancer and adjacent noncancerous tissues were loaded onto SDS-PAGE gels. The proteins were transferred onto PVDF membrane and probed with the indicated antibodies (ACTA-2 and GAPDH). Equal protein loading was evidenced by detection of GAPDH antibody. Relative protein abundance was determined using normalized densitometry data of western blotting.
